# Supplementary material for: Cross-sectional study of paediatric case mix presenting to an emergency centre in Cape Town, South Africa, during COVID-19
Source: PubMed Central journal article supplement — BMJ Paediatr Open. 2020 Sep 22;4(1):e000801. doi: 10.1136/bmjpo-2020-000801 (PMC7509946; doi:10.1136/bmjpo-2020-000801), 2020-09-22
Supplement: bmjpo-2020-000801supp001.pdf [file bmjpo-2020-000801supp001.pdf]

Supplementary table 1. Demographics and characteristics of paediatric patients presenting to the emergency centre during the level 5 COVID-19 lockdown period and corresponding 5-week periods immediately before and after the lockdown and for two previous years.

| Variables n (%)  |                                      | 2018            |                 |                 | 2019            |                 |                 | 2020                           |                                    |                                 |
|------------------|--------------------------------------|-----------------|-----------------|-----------------|-----------------|-----------------|-----------------|--------------------------------|------------------------------------|---------------------------------|
|                  |                                      | 21 Feb – 26 Mar | 27 Mar – 30 Apr | 01 May – 04 Jun | 21 Feb – 26 Mar | 27 Mar – 30 Apr | 01 May – 04 Jun | 21 Feb – 26 Mar (Pre-lockdown) | 27 Mar – 30 Apr (Level 5 lockdown) | 01 May – 04 Jun (Post-lockdown) |
| Age (year)       | <1                                   | 210 (21.2%)     | 372 (31.4%)     | 368 (28.8%)     | 249 (19.7%)     | 351 (24.8%)     | 312 (22.5%)     | 243 (18.1%)                    | 169 (28.5%) <sup>a</sup>           | 116 (21.9%) <sup>b</sup>        |
|                  | 1-5                                  | 528 (53.2%)     | 592 (50%)       | 677 (53%)       | 717 (56.7%)     | 766 (54.2%)     | 742 (53.5%)     | 787 (58.6%)                    | 314 (53%) <sup>a</sup>             | 279 (52.6%)                     |
|                  | >5                                   | 254 (25.6%)     | 219 (18.5%)     | 233 (18.2%)     | 298 (23.6%)     | 296 (20.9%)     | 334 (24.1%)     | 312 (23.2%)                    | 109 (18.4%) <sup>a</sup>           | 135 (25.5%) <sup>b</sup>        |
| Gender           | Female                               | 436 (44%)       | 509 (43%)       | 588 (46%)       | 537 (42.5%)     | 609 (43.1%)     | 610 (43.9%)     | 565 (42.1%)                    | 267 (45.1%)                        | 251 (47.4%)                     |
|                  | Male                                 | 556 (56%)       | 674 (57%)       | 690 (54%)       | 727 (57.5%)     | 804 (56.9%)     | 778 (56.1%)     | 777 (57.9%)                    | 325 (54.9%)                        | 279 (52.6%)                     |
| Transport method | Self                                 | 785 (79.1%)     | 920 (77.8%)     | 1082 (84.7%)    | 1025 (81.1%)    | 1171 (82.9%)    | 1267 (91.3%)    | 1115 (83.1%)                   | 489 (82.6%) <sup>a</sup>           | 476 (89.8%) <sup>b</sup>        |
|                  | Ambulance                            | 130 (13.1%)     | 178 (15%)       | 193 (15.1%)     | 152 (12%)       | 133 (9.4%)      | 120 (8.6%)      | 145 (10.8%)                    | 69 (11.7%)                         | 52 (9.8%)                       |
|                  | Police or Fire service               | 2 (0.2%)        | 1 (0.1%)        | 1 (0.1%)        | 2 (0.2%)        | 4 (0.3%)        | 1 (0.1%)        | 0 (0%)                         | 0 (0%)                             | 0 (0%)                          |
|                  | Unknown                              | 75 (7.6%)       | 84 (7.1%)       | 2 (0.2%)        | 85 (6.7%)       | 105 (7.4%)      | 0 (0%)          | 82 (6.1%)                      | 34 (5.7%)                          | 2 (0.4%) <sup>b</sup>           |
| Arrival from     | Scene / home                         | 658 (66.3%)     | 835 (70.6%)     | 907 (71%)       | 931 (73.7%)     | 1069 (75.7%)    | 1067 (76.9%)    | 1000 (74.5%)                   | 485 (81.9%) <sup>a,c</sup>         | 457 (86.2%) <sup>d</sup>        |
|                  | Other healthcare facility            | 262 (26.4%)     | 266 (22.5%)     | 285 (22.3%)     | 250 (19.8%)     | 242 (17.1%)     | 220 (15.9%)     | 260 (19.4%)                    | 74 (12.5%) <sup>b,c</sup>          | 52 (9.8%) <sup>d</sup>          |
|                  | General Practitioner                 | 72 (7.3%)       | 82 (6.9%)       | 86 (6.7%)       | 83 (6.6%)       | 99 (7%)         | 101 (7.3%)      | 81 (6%)                        | 33 (5.6%)                          | 21 (4%) <sup>d</sup>            |
|                  | Unknown                              | 0 (0%)          | 0 (0%)          | 0 (0%)          | 0 (0%)          | 3 (0.2%)        | 0 (0%)          | 1 (0.1%)                       | 0 (0%)                             | 0 (0%)                          |
| Triage category  | Non-urgent (Green)                   | 238 (24%)       | 202 (17.1%)     | 202 (15.8%)     | 311 (24.6%)     | 287 (20.3%)     | 241 (17.4%)     | 344 (25.6%)                    | 142 (24%)                          | 172 (32.5%) <sup>b,d</sup>      |
|                  | Urgent (Yellow)                      | 516 (52%)       | 622 (52.6%)     | 760 (59.5%)     | 639 (50.6%)     | 758 (53.6%)     | 733 (52.8%)     | 663 (49.4%)                    | 300 (50.7%)                        | 256 (48.3%)                     |
|                  | Very urgent (Orange)                 | 181 (18.2%)     | 286 (24.2%)     | 255 (20%)       | 246 (19.5%)     | 294 (20.8%)     | 351 (25.3%)     | 267 (19.9%)                    | 115 (19.4%)                        | 78 (14.7%) <sup>b,d</sup>       |
|                  | Emergency (Red)                      | 33 (3.3%)       | 41 (3.5%)       | 35 (2.7%)       | 39 (3.1%)       | 40 (2.8%)       | 35 (2.5%)       | 30 (2.2%)                      | 25 (4.2%) <sup>a</sup>             | 17 (3.2%)                       |
|                  | Unknown                              | 24 (2.4%)       | 32 (2.7%)       | 26 (2%)         | 29 (2.3%)       | 34 (2.4%)       | 28 (2%)         | 38 (2.8%)                      | 10 (1.7%)                          | 7 (1.3%)                        |
| Disposition      | Death                                | 2 (0.2%)        | 0 (0%)          | 1 (0.1%)        | 1 (0.1%)        | 4 (0.3%)        | 3 (0.2%)        | 4 (0.3%)                       | 4 (0.7%)                           | 0 (0%)                          |
|                  | Referred to in-hospital disciplines  | 193 (19.5%)     | 251 (21.2%)     | 293 (22.9%)     | 210 (16.6%)     | 209 (14.8%)     | 159 (11.5%)     | 163 (12.1%) <sup>e</sup>       | 105 (17.7%) <sup>a</sup>           | 91 (17.2%) <sup>d</sup>         |
|                  | Discharged                           | 674 (67.9%)     | 770 (65.1%)     | 817 (63.9%)     | 862 (68.2%)     | 946 (66.9%)     | 983 (70.8%)     | 871 (64.9%)                    | 351 (59.3%) <sup>b,c</sup>         | 346 (65.3%) <sup>b,d</sup>      |
|                  | Absconded                            | 28 (2.8%)       | 42 (3.6%)       | 58 (4.5%)       | 66 (5.2%)       | 99 (7%)         | 92 (6.6%)       | 160 (11.9%) <sup>e</sup>       | 33 (5.6%) <sup>a</sup>             | 13 (2.5%) <sup>b,d</sup>        |
|                  | Transferred to higher level facility | 58 (5.8%)       | 86 (7.3%)       | 62 (4.9%)       | 101 (8%)        | 90 (6.4%)       | 87 (6.3%)       | 92 (6.9%)                      | 64 (10.8%) <sup>b,c</sup>          | 65 (12.3%) <sup>d</sup>         |
|                  | Refer to other                       | 37 (3.7%)       | 34 (2.9%)       | 47 (3.7%)       | 24 (1.9%)       | 65 (4.6%)       | 64 (4.6%)       | 52 (3.9%) <sup>e</sup>         | 35 (5.9%)                          | 15 (2.8%) <sup>b</sup>          |

<sup>a</sup> Statistically significant difference ( $p < 0.05$ ) between pre-lockdown period 2020 and level 5 lockdown period 2020 (see supplementary table 2)

<sup>b</sup> Statistically significant difference ( $p < 0.05$ ) between level 5 lockdown period 2020 and post-lockdown period 2020 (see supplementary table 2)

<sup>c</sup> Statistically significant difference ( $p < 0.05$ ) between level 5 lockdown period 2019 and 2020 (see supplementary table 2)

<sup>d</sup> Statistically significant difference ( $p < 0.05$ ) between post-lockdown period 2019 and 2020 (see supplementary table 2)

<sup>e</sup> Statistically significant difference ( $p < 0.05$ ) between pre-lockdown period 2019 and 2020 (see supplementary table 2)
