# Supplementary material for: Cross-sectional study of paediatric case mix presenting to an emergency centre in Cape Town, South Africa, during COVID-19
Source: PubMed Central journal article supplement — BMJ Paediatr Open. 2020 Sep 22;4(1):e000801. doi: 10.1136/bmjpo-2020-000801 (PMC7509946; doi:10.1136/bmjpo-2020-000801), 2020-09-22
Supplement: bmjpo-2020-000801supp002.pdf [file bmjpo-2020-000801supp002.pdf]

Supplementary table 2. Differences between different study periods of demographic and clinical characteristics of paediatric patients presenting to the emergency centre

| Variables<br>n (%)                   | 2020 vs 2019    |       |                 |       |                 |        | 2020                             |        |                                   |        |
|--------------------------------------|-----------------|-------|-----------------|-------|-----------------|--------|----------------------------------|--------|-----------------------------------|--------|
|                                      | 21 Feb – 26 Mar |       | 27 Mar – 30 Apr |       | 01 May – 04 Jun |        | Pre-lockdown vs Level 5 lockdown |        | Level 5 lockdown vs Post-lockdown |        |
|                                      | n (%)           | p     | n (%)           | p     | n (%)           | p      | n (%)                            | p      | n (%)                             | p      |
| <b>Age (year)</b>                    |                 |       |                 |       |                 |        |                                  |        |                                   |        |
| <1                                   | -6 (-2.4)       | 0.317 | -182 (-51.9)    | 0.094 | -196 (-62.8)    | 0.806  | -74 (-30.5)                      | <0.001 | -53 (-31.4)                       | 0.011  |
| 1-5                                  | 70 (9.7)        | 0.322 | -452 (-59.0)    | 0.659 | -463 (-62.4)    | 0.759  | -473 (-60.1)                     | 0.022  | -35 (-11.1)                       | 0.905  |
| >5                                   | 14 (4.)         | 0.853 | -187 (-63.2)    | 0.201 | -199 (-59.6)    | 0.553  | -203 (-65.1)                     | 0.020  | 26 (23.9)                         | 0.005  |
| <b>Gender</b>                        |                 |       |                 |       |                 |        |                                  |        |                                   |        |
| Female                               | 28 (5.2)        | 0.874 | -342 (-56.2)    | 0.430 | -359 (-58.9)    | 0.182  | -298 (-52.7)                     | 0.232  | -16 (-6.0)                        | 0.472  |
| Male                                 | 50 (6.9)        | 0.000 | -479 (-59.6)    |       | -499 (-64.1)    | 0.000  | -452 (-58.2)                     | 0.000  | -46 (-14.2)                       | 0.000  |
| <b>Transport method</b>              |                 |       |                 |       |                 |        |                                  |        |                                   |        |
| Self                                 | 90 (8.8)        | 0.201 | -682 (-58.2)    | 0.897 | -791 (-62.4)    | 0.330  | -626 (-56.1)                     | 0.844  | -13 (-2.7)                        | 0.001  |
| Ambulance                            | -7 (-4.6)       | 0.355 | -64 (-48.1)     | 0.143 | -68 (-56.7)     | 0.475  | -76 (-52.4)                      | 0.637  | -17 (-24.6)                       | 0.336  |
| Police or Fire service               | -2 (-100)       | 0.235 | -4 (-100)       | 0.326 | -1 (-100)       | 1.000  | 0 (0)                            | ---    | 0 (0)                             | ---    |
| Unknown                              | -3 (-3.5)       | 0.575 | -71 (-67.6)     | 0.179 | 2 (200)         | 0.076  | -48 (-58.5)                      | 0.758  | -32 (-94.1)                       | <0.001 |
| <b>Arrival from</b>                  |                 |       |                 |       |                 |        |                                  |        |                                   |        |
| Scene / home                         | 69 (7.4)        | 0.623 | -584 (-54.6)    | 0.002 | -610 (-57.2)    | <0.001 | -515 (-51.5)                     | <0.001 | -28 (-5.8)                        | 0.051  |
| Other healthcare facility            | 10 (4)          | 0.805 | -168 (-69.4)    | 0.011 | -168 (-76.4)    | 0.001  | -186 (-71.5)                     | <0.001 | -22 (-29.7)                       | 0.157  |
| General Practitioner                 | -2 (-2.4)       | 0.628 | -66 (-66.7)     | 0.277 | -80 (-79.2)     | 0.009  | -48 (-59.3)                      | 0.754  | -12 (-36.4)                       | 0.213  |
| Unknown                              | 1 (100)         | 1.000 | -3 (-100)       | 0.560 | 0 (0)           | ---    | -1 (-100)                        | 1.000  | 0 (0)                             | ---    |
| <b>Triage category</b>               |                 |       |                 |       |                 |        |                                  |        |                                   |        |
| Non-urgent (Green)                   | 33 (10.6)       | 0.557 | -145 (-50.5)    | 0.073 | -69 (-28.6)     | <0.001 | -202 (-58.2)                     | 0.460  | -30 (-14.2)                       | 0.002  |
| Urgent (Yellow)                      | 24 (3.7)        | 0.292 | -458 (-60.4)    | 0.239 | -477 (-65.1)    | 0.082  | -363 (-58.7)                     | 0.622  | -44 (-21.1)                       | 0.437  |
| Very urgent (Orange)                 | 21 (8.5)        | 0.805 | -179 (-60.9)    | 0.504 | -273 (-77.8)    | <0.001 | -152 (-54.8)                     | 0.853  | -37 (-14.7)                       | 0.039  |
| Emergency (Red)                      | -9 (-23.1)      | 0.182 | -15 (-37.5)     | 0.128 | -18 (-51.4)     | 0.432  | -5 (-56.9)                       | 0.018  | -8 (-32.2)                        | 0.432  |
| Unknown                              | 9 (31.0)        | 0.458 | -24 (-70.6)     | 0.404 | -21 (-75)       | 0.347  | -28 (-73.7)                      | 0.155  | -3 (-30)                          | 0.636  |
| <b>Disposition</b>                   |                 |       |                 |       |                 |        |                                  |        |                                   |        |
| Referred to in-hospital disciplines  | 3 (300)         | 0.376 | 0 (0)           | 0.246 | -3 (-100)       | 0.565  | 0 (0)                            | 0.258  | -4 (-100)                         | 0.127  |
| Discharged                           | -47 (-22.4)     | 0.001 | -104 (-49.8)    | 0.106 | -68 (-42.8)     | 0.001  | -58 (-35.6)                      | 0.001  | -14 (-13.3)                       | 0.814  |
| Absconded                            | 9 (1.0)         | 0.081 | -595 (-62.9)    | 0.001 | -637 (-64.8)    | 0.020  | -520 (-59.7)                     | 0.019  | -5 (-1.4)                         | 0.042  |
| Transferred to higher level facility | 94 (142.4)      | 0.001 | -66 (-66.7)     | 0.277 | -79 (-85.9)     | 0.001  | -127 (-79.4)                     | 0.001  | -20 (-60.6)                       | 0.010  |
| Refer to other                       | -9 (-8.9)       | 0.295 | -26 (-28.9)     | 0.001 | -22 (-25.3)     | <0.001 | -28 (-30.4)                      | 0.004  | 1 (1.6)                           | 0.455  |
| Referred to in-hospital disciplines  | 28 (116.7)      | 0.003 | -30 (-46.2)     | 0.260 | -49 (-76.6)     | 0.094  | -17 (-32.7)                      | 0.056  | -20 (-57.1)                       | 0.014  |

Pre-lockdown period: 21 February – 26 March; Lockdown period: 27 March – 30 April; Post-lockdown period: 01 May – 04 June
