# Supplementary material for: Cross-sectional study of paediatric case mix presenting to an emergency centre in Cape Town, South Africa, during COVID-19
Source: PubMed Central journal article supplement — BMJ Paediatr Open. 2020 Sep 22;4(1):e000801. doi: 10.1136/bmjpo-2020-000801 (PMC7509946; doi:10.1136/bmjpo-2020-000801), 2020-09-22
Supplement: bmjpo-2020-000801supp003.pdf [file bmjpo-2020-000801supp003.pdf]

Supplementary table 3. Top five diagnostic categories per age group presenting to the emergency centre during the level 5 COVID-19 lockdown period and similar time periods.

| 27 March – 30 April 2019           |               | 21 February – 26 March 2020<br>(Pre-lockdown) |               | 27 March – 30 April 2020<br>(level 5 lockdown) |               | 01 May – 04 June 2020 (Post-lockdown) |               |
|------------------------------------|---------------|-----------------------------------------------|---------------|------------------------------------------------|---------------|---------------------------------------|---------------|
| ICD-10 Category                    | n (%)         | ICD-10 Category                               | n (%)         | ICD-10 Category                                | n (%)         | ICD-10 Category                       | n (%)         |
| <b>All</b>                         |               |                                               |               |                                                |               |                                       |               |
| Respiratory system                 | 442<br>(35.0) | Respiratory system                            | 426<br>(31.7) | Respiratory system                             | 141<br>(23.8) | Injury and poisoning                  | 153<br>(28.9) |
| Infectious diseases                | 247<br>(19.5) | Injury and poisoning                          | 208<br>(15.5) | Injury and poisoning                           | 133<br>(22.5) | Respiratory system                    | 134<br>(25.3) |
| Injury and poisoning               | 209<br>(16.5) | Infectious diseases                           | 167<br>(12.4) | Infectious diseases                            | 110<br>(18.6) | Infectious diseases                   | 70<br>(13.2)  |
| Findings, not elsewhere classified | 51<br>(4.0)   | Findings, not elsewhere classified            | 89<br>(6.6)   | Nervous system                                 | 30<br>(5.1)   | Findings, not elsewhere classified    | 31<br>(5.8)   |
| Nervous system                     | 49<br>(3.9)   | Ear and mastoid process                       | 65<br>(4.8)   | Skin and subcutaneous tissue                   | 26<br>(4.4)   | Digestive system                      | 24<br>(4.5)   |
|                                    |               |                                               |               |                                                |               | Skin and subcutaneous tissue          | 24<br>(4.5)   |
| <b>&lt;1 year</b>                  |               |                                               |               |                                                |               |                                       |               |
| Respiratory system                 | 200<br>(57.0) | Respiratory system                            | 78<br>(32.1)  | Infectious diseases                            | 52<br>(30.8)  | Infectious diseases                   | 33<br>(28.4)  |
| Infectious diseases                | 65<br>(18.5)  | Infectious diseases                           | 61<br>(25.1)  | Respiratory system                             | 43<br>(25.4)  | Respiratory system                    | 29<br>(25.0)  |
| Findings, not elsewhere classified | 11<br>(3.1)   | Findings, not elsewhere classified            | 20<br>(8.2)   | Findings, not elsewhere classified             | 13<br>(7.7)   | Injury and poisoning                  | 13<br>(11.2)  |
| Injury and poisoning               | 10<br>(2.8)   | Injury and poisoning                          | 18<br>(7.4)   | Skin and subcutaneous tissue                   | 11<br>(6.5)   | Skin and subcutaneous tissue          | 9 (7.8)       |
| Skin and subcutaneous tissue       | 7 (2.0)       | Skin and subcutaneous tissue                  | 10<br>(4.1)   | Injury and poisoning                           | 8 (4.7)       | Digestive system                      | 6 (5.2)       |
| Ear and mastoid process            | 7 (2.0)       |                                               |               |                                                |               |                                       |               |
| <b>1-5 year</b>                    |               |                                               |               |                                                |               |                                       |               |
| Respiratory system                 | 294<br>(38.4) | Respiratory system                            | 284<br>(36.1) | Respiratory system                             | 84<br>(26.8)  | Injury and poisoning                  | 93<br>(33.3)  |
| Infectious diseases                | 125<br>(16.3) | Injury and poisoning                          | 108<br>(13.7) | Injury and poisoning                           | 79<br>(25.2)  | Respiratory system                    | 79<br>(28.3)  |
| Injury and poisoning               | 78<br>(10.2)  | Infectious diseases                           | 91<br>(11.6)  | Infectious diseases                            | 47<br>(15.0)  | Infectious diseases                   | 23<br>(8.2)   |
| Ear and mastoid process            | 50<br>(6.5)   | Ear and mastoid process                       | 51<br>(6.5)   | Nervous system                                 | 16<br>(5.1)   | Findings, not elsewhere classified    | 20<br>(7.2)   |
| Findings, not elsewhere classified | 32<br>(4.2)   | Findings, not elsewhere classified            | 36<br>(4.6)   | Ear and mastoid process                        | 14<br>(4.5)   | Ear and mastoid process               | 12<br>(4.3)   |
| <b>&gt; 5 year</b>                 |               |                                               |               |                                                |               |                                       |               |
| Respiratory system                 | 58<br>(7.6)   | Injury and poisoning                          | 82<br>(10.4)  | Injury and poisoning                           | 46<br>(14.6)  | Injury and poisoning                  | 47<br>(16.8)  |
| Injury and poisoning               | 57<br>(7.4)   | Respiratory system                            | 64<br>(8.1)   | Respiratory system                             | 14<br>(4.5)   | Respiratory system                    | 26<br>(9.3)   |
| Infectious diseases                | 38<br>(5.0)   | Findings, not elsewhere classified            | 33<br>(4.2)   | Infectious diseases                            | 11<br>(3.5)   | Infectious diseases                   | 14<br>(5.0)   |
| Findings, not elsewhere classified | 27<br>(3.5)   | Nervous system                                | 19<br>(2.4)   | Nervous system                                 | 10<br>(3.2)   | Digestive system                      | 12<br>(4.3)   |
| Nervous system                     | 24<br>(3.1)   | Skin and subcutaneous tissue                  | 16<br>(2.0)   | Digestive system                               | 5 (1.6)       | Nervous system                        | 7 (2.5)       |
|                                    |               | Genitourinary system                          | 16<br>(2.0)   |                                                |               |                                       |               |

ICD-10: International Statistical Classification of Diseases and Related Health Problems, 10th revision
