# Supplementary material for: Cross-sectional study of paediatric case mix presenting to an emergency centre in Cape Town, South Africa, during COVID-19
Source: PubMed Central journal article supplement — BMJ Paediatr Open. 2020 Sep 22;4(1):e000801. doi: 10.1136/bmjpo-2020-000801 (PMC7509946; doi:10.1136/bmjpo-2020-000801), 2020-09-22
Supplement: bmjpo-2020-000801supp004.pdf [file bmjpo-2020-000801supp004.pdf]

Supplementary table 4. Actual and proportional differences of paediatric presentations to the emergency centre during the level 5 lockdown period and similar 5-week periods before and after, compared to the previous two years.

| ICD-10 category                                  | 2020 vs 2018                   |              |                  |                                    |              |                  |                                 |              |                  | 2020 vs 2019                   |              |                  |                                    |              |                  |                                 |              |                  |
|--------------------------------------------------|--------------------------------|--------------|------------------|------------------------------------|--------------|------------------|---------------------------------|--------------|------------------|--------------------------------|--------------|------------------|------------------------------------|--------------|------------------|---------------------------------|--------------|------------------|
|                                                  | 21 Feb – 26 Mar (Pre-lockdown) |              |                  | 27 Mar – 30 Apr (Level 5 lockdown) |              |                  | 01 May – 04 Jun (Post-lockdown) |              |                  | 21 Feb – 26 Mar (Pre-lockdown) |              |                  | 27 Mar – 30 Apr (Level 5 lockdown) |              |                  | 01 May – 04 Jun (Post-lockdown) |              |                  |
|                                                  | Actual n (%)                   | Proportional | p                | Actual n (%)                       | Proportional | p                | Actual n (%)                    | Proportional | p                | Actual n (%)                   | Proportional | p                | Actual n (%)                       | Proportional | p                | Actual n (%)                    | Proportional | p                |
| I Certain infectious and parasitic diseases      | -53 (-31.7)                    | -9.8%        | 0.574            | -97 (-88.2)                        | 1.1%         | 0.564            | -155 (-221.4)                   | -4.4%        | 0.210            | -80 (-32.4)                    | -7.1%        | <b>&lt;0.001</b> | -118 (-51.8)                       | 2.5%         | 0.191            | -97 (-58.1)                     | 1.2%         | 0.486            |
| VI Diseases of the nervous system                | 21 (50)                        | 1.0%         | <b>&lt;0.001</b> | 14 (46.7)                          | 3.7%         | <b>&lt;0.001</b> | -8 (-50)                        | 1.1%         | 0.133            | -7 (-14.3)                     | -0.8%        | 0.337            | -14 (-31.8)                        | 2.0%         | <b>0.038</b>     | -23 (-59.0)                     | 0.2%         | 0.878            |
| VIII Diseases of the ear and mastoid process     | 40 (61.5)                      | 2.3%         | 0.927            | -23 (-104.5)                       | -0.1%        | 0.927            | -52 (-371.4)                    | -2.6%        | 0.018            | 22 (51.2)                      | 1.4%         | 0.076            | -42 (-65.6)                        | -0.8%        | 0.469            | -50 (-78.1)                     | -2.0%        | 0.053            |
| X Diseases of the respiratory system             | 118 (27.7)                     | 0.7%         | <b>&lt;0.001</b> | -359 (-254.6)                      | -18.5%       | <b>&lt;0.001</b> | -378 (-282.1)                   | -14.8%       | <b>&lt;0.001</b> | -16 (-3.6)                     | -3.3%        | 0.081            | -411 (-74.5)                       | -15.3%       | <b>&lt;0.001</b> | -466 (-77.7)                    | -17.9%       | <b>&lt;0.001</b> |
| XI Diseases of the digestive system              | -6 (-21.4)                     | -1.3%        | 0.370            | -19 (-172.7)                       | -0.6%        | 0.370            | -3 (-12.5)                      | 2.4%         | 0.005            | 2 (7.7)                        | 0.0%         | 1.000            | -18 (-62.1)                        | -0.2%        | 0.862            | 1 (4.3)                         | 2.8%         | 0.000            |
| XII Diseases of the skin and subcutaneous tissue | -33 (-67.3)                    | -4.6%        | 0.580            | -33 (-126.9)                       | -0.6%        | 0.580            | -26 (-108.3)                    | 0.6%         | 0.547            | 1 (2.1)                        | -0.1%        | 0.819            | -20 (-43.5)                        | 1.1%         | 0.236            | -12 (-33.3)                     | 1.9%         | <b>0.039</b>     |
| XIV Diseases of the genitourinary system         | 7 (17.5)                       | -0.3%        | 0.329            | -6 (-42.9)                         | 0.7%         | 0.329            | -13 (-108.3)                    | 0.3%         | 0.674            | 22 (122.2)                     | 1.6%         | <b>0.008</b>     | -13 (-48.5)                        | 0.5%         | 0.604            | -10 (-45.5)                     | 0.7%         | 0.334            |
| XVIII Symptoms, signs and                        | 39 (43.8)                      | 1.6%         | 0.280            | -39 (-156.0)                       | -1.2%        | 0.280            | -27 (-87.1)                     | 1.3%         | 0.241            | 38 (74.5)                      | 2.6%         | <b>0.004</b>     | -45 (-64.3)                        | -0.8%        | 0.493            | -42 (-57.5)                     | 0.5%         | 0.652            |

|                                                                         |              |      |        |              |       |        |              |       |        |           |       |       |            |       |        |             |       |        |
|-------------------------------------------------------------------------|--------------|------|--------|--------------|-------|--------|--------------|-------|--------|-----------|-------|-------|------------|-------|--------|-------------|-------|--------|
| abnormal clinical and laboratory findings, not elsewhere classified     |              |      |        |              |       |        |              |       |        |           |       |       |            |       |        |             |       |        |
| XIX Injury, poisoning and certain other consequences of external causes | 75<br>(36.1) | 2.1% | <0.001 | 14<br>(10.5) | 12.4% | <0.001 | 59<br>(38.6) | 21.5% | <0.001 | -1 (-0.5) | -1.0% | 0.487 | -12 (-8.3) | 12.2% | <0.001 | -21 (-12.1) | 16.4% | <0.001 |
