# Supplementary material for: Cross-sectional study of paediatric case mix presenting to an emergency centre in Cape Town, South Africa, during COVID-19
Source: PubMed Central journal article supplement — BMJ Paediatr Open. 2020 Sep 22;4(1):e000801. doi: 10.1136/bmjpo-2020-000801 (PMC7509946; doi:10.1136/bmjpo-2020-000801), 2020-09-22
Supplement: bmjpo-2020-000801supp005.pdf [file bmjpo-2020-000801supp005.pdf]

Supplementary table 5. Diagnostic categories of paediatric patients presenting to the emergency centre during the level 5 COVID-19 lockdown period and corresponding time periods.

| ICD-10 Category, n(%)                                                                                   | 2018            |                 |                 | 2019            |                 |                 | 2020                           |                                    |                                 |
|---------------------------------------------------------------------------------------------------------|-----------------|-----------------|-----------------|-----------------|-----------------|-----------------|--------------------------------|------------------------------------|---------------------------------|
|                                                                                                         | 21 Feb – 26 Mar | 27 Mar – 30 Apr | 01 May – 04 Jun | 21 Feb – 26 Mar | 27 Mar – 30 Apr | 01 May – 04 Jun | 21 Feb – 26 Mar (Pre-lockdown) | 27 Mar – 30 Apr (Level 5 lockdown) | 01 May – 04 Jun (Post-lockdown) |
| I Certain infectious and parasitic diseases                                                             | 220 (22.2%)     | 207 (17.5%)     | 225 (17.6%)     | 247 (19.5%)     | 228 (16.1%)     | 167 (12%)       | 167 (12.4%)                    | 110 (18.6%)                        | 70 (13.2%)                      |
| II Neoplasms                                                                                            | 1 (0.1%)        | 2 (0.2%)        | 0 (0%)          | 0 (0%)          | 3 (0.2%)        | 2 (0.1%)        | 0 (0%)                         | 0 (0%)                             | 0 (0%)                          |
| III Diseases of the blood and blood-forming organs and certain disorders involving the immune mechanism | 0 (0%)          | 0 (0%)          | 1 (0.1%)        | 2 (0.2%)        | 1 (0.1%)        | 0 (0%)          | 1 (0.1%)                       | 1 (0.2%)                           | 3 (0.6%)                        |
| IV Endocrine, nutritional and metabolic diseases                                                        | 1 (0.1%)        | 1 (0.1%)        | 7 (0.5%)        | 8 (0.6%)        | 7 (0.5%)        | 8 (0.6%)        | 2 (0.1%)                       | 1 (0.2%)                           | 2 (0.4%)                        |
| V Mental and behavioural disorders                                                                      | 1 (0.1%)        | 3 (0.3%)        | 3 (0.2%)        | 2 (0.2%)        | 0 (0%)          | 6 (0.4%)        | 0 (0%)                         | 2 (0.3%)                           | 0 (0%)                          |
| VI Diseases of the nervous system                                                                       | 21 (2.1%)       | 16 (1.4%)       | 24 (1.9%)       | 49 (3.9%)       | 44 (3.1%)       | 39 (2.8%)       | 42 (3.1%)                      | 30 (5.1%)                          | 16 (3%)                         |
| VII Diseases of the eye and adnexa                                                                      | 6 (0.6%)        | 4 (0.3%)        | 8 (0.6%)        | 10 (0.8%)       | 11 (0.8%)       | 14 (1%)         | 9 (0.7%)                       | 2 (0.3%)                           | 1 (0.2%)                        |
| VIII Diseases of the ear and mastoid process                                                            | 25 (2.5%)       | 45 (3.8%)       | 66 (5.2%)       | 43 (3.4%)       | 64 (4.5%)       | 64 (4.6%)       | 65 (4.8%)                      | 22 (3.7%)                          | 14 (2.6%)                       |
| IX Diseases of the circulatory system                                                                   | 0 (0%)          | 0 (0%)          | 2 (0.2%)        | 3 (0.2%)        | 6 (0.4%)        | 2 (0.1%)        | 1 (0.1%)                       | 1 (0.2%)                           | 0 (0%)                          |
| X Diseases of the respiratory system                                                                    | 308 (31%)       | 500 (42.3%)     | 512 (40.1%)     | 442 (35%)       | 552 (39.1%)     | 600 (43.2%)     | 426 (31.7%)                    | 141 (23.8%)                        | 134 (25.3%)                     |
| XI Diseases of the digestive system                                                                     | 34 (3.4%)       | 30 (2.5%)       | 27 (2.1%)       | 26 (2.1%)       | 29 (2.1%)       | 23 (1.7%)       | 28 (2.1%)                      | 11 (1.9%)                          | 24 (4.5%)                       |
| XII Diseases of the skin and subcutaneous tissue                                                        | 82 (8.3%)       | 59 (5%)         | 50 (3.9%)       | 48 (3.8%)       | 46 (3.3%)       | 36 (2.6%)       | 49 (3.7%)                      | 26 (4.4%)                          | 24 (4.5%)                       |
| XIII Diseases of the musculoskeletal system and connective tissue                                       | 1 (0.1%)        | 6 (0.5%)        | 3 (0.2%)        | 8 (0.6%)        | 17 (1.2%)       | 8 (0.6%)        | 2 (0.1%)                       | 2 (0.3%)                           | 7 (1.3%)                        |
| XIV Diseases of the genitourinary system                                                                | 33 (3.3%)       | 20 (1.7%)       | 25 (2%)         | 18 (1.4%)       | 27 (1.9%)       | 22 (1.6%)       | 40 (3%)                        | 14 (2.4%)                          | 12 (2.3%)                       |
| XV Pregnancy, childbirth and the puerperium                                                             | 0 (0%)          | 0 (0%)          | 0 (0%)          | 0 (0%)          | 0 (0%)          | 0 (0%)          | 0 (0%)                         | 0 (0%)                             | 1 (0.2%)                        |
| XVI Certain conditions originating in the perinatal period                                              | 0 (0%)          | 1 (0.1%)        | 3 (0.2%)        | 2 (0.2%)        | 2 (0.1%)        | 2 (0.1%)        | 2 (0.1%)                       | 4 (0.7%)                           | 3 (0.6%)                        |
| XVII Congenital malformations, deformations and chromosomal abnormalities                               | 1 (0.1%)        | 0 (0%)          | 1 (0.1%)        | 1 (0.1%)        | 0 (0%)          | 0 (0%)          | 0 (0%)                         | 0 (0%)                             | 2 (0.4%)                        |
| XVIII Symptoms, signs and abnormal clinical and laboratory findings, not elsewhere classified           | 50 (5%)         | 64 (5.4%)       | 58 (4.5%)       | 51 (4%)         | 70 (5%)         | 73 (5.3%)       | 89 (6.6%)                      | 25 (4.2%)                          | 31 (5.8%)                       |
| XIX Injury, poisoning and certain other consequences of external causes                                 | 133 (13.4%)     | 119 (10.1%)     | 94 (7.4%)       | 209 (16.5%)     | 145 (10.3%)     | 174 (12.5%)     | 208 (15.5%)                    | 133 (22.5%)                        | 153 (28.9%)                     |
| XX External causes of morbidity and mortality                                                           | 36 (3.6%)       | 41 (3.5%)       | 40 (3.1%)       | 6 (0.5%)        | 9 (0.6%)        | 8 (0.6%)        | 11 (0.8%)                      | 4 (0.7%)                           | 5 (0.9%)                        |
| XXI Factors influencing health status and contact with health services                                  | 6 (0.6%)        | 10 (0.8%)       | 14 (1.1%)       | 14 (1.1%)       | 9 (0.6%)        | 2 (0.1%)        | 15 (1.1%)                      | 8 (1.4%)                           | 7 (1.3%)                        |
| Unknown                                                                                                 | 33 (3.3%)       | 55 (4.6%)       | 115 (9%)        | 75 (5.9%)       | 143 (10.1%)     | 138 (9.9%)      | 185 (13.8%)                    | 55 (9.3%)                          | 21 (4%)                         |
