# Supplementary material for: Cross-sectional study of paediatric case mix presenting to an emergency centre in Cape Town, South Africa, during COVID-19
Source: PubMed Central journal article supplement — BMJ Paediatr Open. 2020 Sep 22;4(1):e000801. doi: 10.1136/bmjpo-2020-000801 (PMC7509946; doi:10.1136/bmjpo-2020-000801), 2020-09-22
Supplement: bmjpo-2020-000801supp006.pdf [file bmjpo-2020-000801supp006.pdf]

Supplementary table 6. Diagnostic categories of paediatric patients admitted during the level 5 COVID-19 lockdown period and corresponding 5-week periods immediately before and after the lockdown and for two previous years.

|                                                                                               | 2018            |                 |                 | 2019            |                 |                 | 2020                           |                                    |                                 |
|-----------------------------------------------------------------------------------------------|-----------------|-----------------|-----------------|-----------------|-----------------|-----------------|--------------------------------|------------------------------------|---------------------------------|
|                                                                                               | 21 Feb – 26 Mar | 27 Mar – 30 Apr | 01 May – 04 Jun | 21 Feb – 26 Mar | 27 Mar – 30 Apr | 01 May – 04 Jun | 21 Feb – 26 Mar (Pre-lockdown) | 27 Mar – 30 Apr (Level 5 lockdown) | 01 May – 04 Jun (Post-lockdown) |
| ICD-10 category                                                                               | n (%)                          | n (%)                              | n (%)                           |
| I Certain infectious and parasitic diseases                                                   | 82 (42.5%)      | 78 (31.1%)      | 85 (29.0%)      | 64 (30.5%)      | 60 (28.7%)      | 37 (23.3%)      | 50 (30.7%)                     | 36 (34.3%)                         | 29 (31.9%)                      |
| VI Diseases of the nervous system                                                             | 9 (4.7%)        | 8 (3.2%)        | 8 (2.7%)        | 28 (13.3%)      | 19 (9.1%)       | 12 (7.5%)       | 20 (12.3%)                     | 7 (6.7%)                           | 4 (4.4%)                        |
| VIII Diseases of the ear and mastoid process                                                  | 3 (1.6%)        | 1 (0.4%)        | 2 (0.7%)        | 1 (0.5%)        | 3 (1.4%)        | 8 (5.0%)        | 6 (3.7%)                       | 1 (1.0%)                           | 0 (0.0%)                        |
| X Diseases of the respiratory system                                                          | 73 (37.8%)      | 140 (55.8%)     | 131 (44.7%)     | 98 (46.7%)      | 107 (51.2%)     | 72 (45.4%)      | 56 (34.4%)                     | 40 (38.1%)                         | 37 (40.7%)                      |
| XI Diseases of the digestive system                                                           | 2 (1.0%)        | 1 (0.4%)        | 1 (0.3%)        | 1 (0.5%)        | 0 (0.0%)        | 2 (1.3%)        | 2 (1.2%)                       | 2 (1.9%)                           | 0 (0.0%)                        |
| XII Diseases of the skin and subcutaneous tissue                                              | 7 (3.6%)        | 4 (1.6%)        | 1 (0.3%)        | 1 (0.5%)        | 3 (1.4%)        | 1 (0.6%)        | 4 (2.5%)                       | 0 (0.0%)                           | 1 (1.1%)                        |
| XIV Diseases of the genitourinary system                                                      | 4 (2.0%)        | 1 (0.4%)        | 0 (0.0%)        | 2 (1.0%)        | 1 (0.5%)        | 0 (0.0%)        | 7 (4.3%)                       | 4 (3.8%)                           | 3 (3.3%)                        |
| XVIII Symptoms, signs and abnormal clinical and laboratory findings, not elsewhere classified | 10 (5.2%)       | 14 (5.6%)       | 15 (5.1%)       | 9 (4.3%)        | 6 (2.9%)        | 14 (8.8%)       | 13 (8.0%)                      | 6 (5.7%)                           | 5 (5.5%)                        |
| XIX Injury, poisoning and certain other consequences of external causes                       | 1 (0.5%)        | 1 (0.4%)        | 5 (1.7%)        | 1 (0.5%)        | 1 (0.5%)        | 2 (1.3%)        | 3 (1.8%)                       | 1 (1.0%)                           | 3 (3.3%)                        |
| Other                                                                                         | 2 (1.0%)        | 3 (1.2%)        | 45 (15.4%)      | 5 (2.4%)        | 9 (4.3%)        | 11 (6.9%)       | 2 (1.2%)                       | 8 (7.6%)                           | 9 (9.9%)                        |
|                                                                                               | 193 (100%)      | 251 (100%)      | 293 (100%)      | 210 (100%)      | 209 (100%)      | 159 (100%)      | 163 (100%)                     | 105 (100%)                         | 91 (100%)                       |
