# Supplementary material for: Cross-sectional study of paediatric case mix presenting to an emergency centre in Cape Town, South Africa, during COVID-19
Source: PubMed Central journal article supplement — BMJ Paediatr Open. 2020 Sep 22;4(1):e000801. doi: 10.1136/bmjpo-2020-000801 (PMC7509946; doi:10.1136/bmjpo-2020-000801), 2020-09-22
Supplement: bmjpo-2020-000801supp007.pdf [file bmjpo-2020-000801supp007.pdf]

Supplementary table 7. Diagnostic categories of paediatric patients transferred to higher level of care during the level 5 COVID-19 lockdown period and corresponding 5-week periods immediately before and after the lockdown and for two previous years.

|                                                                                               | 2018            |                 |                 | 2019            |                 |                 | 2020                           |                                    |                                 |
|-----------------------------------------------------------------------------------------------|-----------------|-----------------|-----------------|-----------------|-----------------|-----------------|--------------------------------|------------------------------------|---------------------------------|
|                                                                                               | 21 Feb – 26 Mar | 27 Mar – 30 Apr | 01 May – 04 Jun | 21 Feb – 26 Mar | 27 Mar – 30 Apr | 01 May – 04 Jun | 21 Feb – 26 Mar (Pre-lockdown) | 27 Mar – 30 Apr (Level 5 lockdown) | 01 May – 04 Jun (Post-lockdown) |
| ICD-10 category                                                                               | n (%)                          | n (%)                              | n (%)                           |
| I Certain infectious and parasitic diseases                                                   | 9 (15.5%)       | 15 (17.4%)      | 7 (11.3%)       | 15 (14.9%)      | 11 (12.2%)      | 11 (12.6%)      | 20 (21.7%)                     | 21 (32.8%)                         | 7 (10.8%)                       |
| VI Diseases of the nervous system                                                             | 5 (8.6%)        | 5 (5.8%)        | 5 (8.1%)        | 8 (7.9%)        | 7 (7.8%)        | 12 (13.8%)      | 7 (7.6%)                       | 6 (9.4%)                           | 3 (4.6%)                        |
| X Diseases of the respiratory system                                                          | 8 (13.8%)       | 23 (26.7%)      | 15 (24.2%)      | 22 (21.8%)      | 30 (33.3%)      | 20 (23.0%)      | 10 (10.9%)                     | 6 (9.4%)                           | 12 (18.5%)                      |
| XI Diseases of the digestive system                                                           | 8 (13.8%)       | 6 (7.0%)        | 2 (3.2%)        | 5 (5.0%)        | 7 (7.8%)        | 5 (5.7%)        | 11 (12.0%)                     | 3 (4.7%)                           | 11 (16.9%)                      |
| XII Diseases of the skin and subcutaneous tissue                                              | 10 (17.2%)      | 6 (7.0%)        | 9 (14.5%)       | 9 (8.9%)        | 7 (7.8%)        | 4 (4.6%)        | 10 (10.9%)                     | 6 (9.4%)                           | 3 (4.6%)                        |
| XIV Diseases of the genitourinary system                                                      | 0 (0.0%)        | 2 (2.3%)        | 0 (0.0%)        | 2 (2.0%)        | 1 (1.1%)        | 3 (3.4%)        | 4 (4.3%)                       | 2 (3.1%)                           | 1 (1.5%)                        |
| XVIII Symptoms, signs and abnormal clinical and laboratory findings, not elsewhere classified | 1 (1.7%)        | 4 (4.7%)        | 2 (3.2%)        | 3 (3.0%)        | 7 (7.8%)        | 1 (1.1%)        | 3 (3.3%)                       | 0 (0.0%)                           | 2 (3.1%)                        |
| XIX Injury, poisoning and certain other consequences of external causes                       | 15 (25.9%)      | 16 (18.6%)      | 13 (21.0%)      | 30 (29.7%)      | 12 (13.3%)      | 25 (28.7%)      | 23 (25.0%)                     | 16 (25.0%)                         | 23 (35.4%)                      |
| Other                                                                                         | 2 (3.4%)        | 9 (10.5%)       | 9 (14.5%)       | 7 (6.9%)        | 8 (8.9%)        | 6 (6.9%)        | 4 (4.3%)                       | 4 (6.3%)                           | 3 (4.6%)                        |
|                                                                                               | 58 (100%)       | 86 (100%)       | 62 (100%)       | 101 (100%)      | 90 (100%)       | 87 (100%)       | 92 (100%)                      | 64 (100%)                          | 65 (100%)                       |
